# Supplementary material
Source: HighWire-hosted journal article supplement (https://emj.bmj.com/content/emermed-2015-205623)
Supplement: inline-supplementary-material-1 [file inline-supplementary-material-1.pdf]

Supplementary table 1. Median weights for each value of MAC (overall and for each gender)

| Mid arm circumference (cm) | Median weights (kg) |       |        |
|----------------------------|---------------------|-------|--------|
|                            | All subjects        | Male  | Female |
| 13                         | 8.2                 | 8.0   | 8.8    |
| 14                         | 10.2                | 10.3  | 10.2   |
| 15                         | 12.5                | 12.8  | 12.2   |
| 16                         | 14.9                | 15.4  | 14.5   |
| 17                         | 17.7                | 18.3  | 17.2   |
| 18                         | 21.0                | 21.5  | 20.4   |
| 19                         | 24.7                | 25.1  | 24.3   |
| 20                         | 28.7                | 28.9  | 28.5   |
| 21                         | 33.0                | 32.9  | 33.0   |
| 22                         | 37.3                | 37.1  | 37.5   |
| 23                         | 41.7                | 41.4  | 42.0   |
| 24                         | 45.9                | 45.8  | 46.2   |
| 25                         | 50.0                | 50.1  | 50.0   |
| 26                         | 53.9                | 54.3  | 53.6   |
| 27                         | 57.6                | 58.5  | 57.0   |
| 28                         | 61.3                | 62.5  | 60.2   |
| 29                         | 64.8                | 66.4  | 63.4   |
| 30                         | 68.4                | 70.1  | 66.7   |
| 31                         | 72.0                | 73.7  | 70.0   |
| 32                         | 75.5                | 77.3  | 73.5   |
| 33                         | 79.2                | 80.8  | 77.0   |
| 34                         | 82.9                | 84.5  | 80.7   |
| 35                         | 86.7                | 88.3  | 84.3   |
| 36                         | 90.6                | 92.3  | 88.0   |
| 37                         | 94.7                | 96.6  | 91.7   |
| 38                         | 98.7                | 101.1 | 95.4   |
| 39                         | 102.8               | 105.7 | 99.0   |
| 40                         | 106.8               | 110.4 | 102.6  |
| 41                         | 110.8               | 115.3 | 106.1  |
| 42                         | 114.9               | 120.3 | 109.6  |
| 43                         | 118.9               | 125.5 | 113.1  |
| 44                         | 123.0               | 130.7 | 116.6  |
| 45                         | 127.1               | 136.0 | 120.1  |
| 46                         | 131.2               | 141.4 | 123.7  |
| 47                         | 135.4               | 146.9 | 127.3  |
| 48                         | 139.6               | 152.3 | 130.9  |
| 49                         | 143.7               | 157.8 | 134.6  |

|    |       |       |       |
|----|-------|-------|-------|
| 50 | 147.9 | 163.3 | 138.3 |
| 51 | 152.1 | 168.7 | 142.0 |
| 52 | 156.3 | 174.2 | 145.8 |
| 53 | 160.6 | 179.7 | 149.5 |
| 54 | 164.8 | 185.1 | 153.3 |
| 55 | 169.0 | 190.6 | 157.1 |
| 56 | 173.2 | 196.1 | 160.9 |
| 57 | 177.5 | na    | 164.7 |
| 58 | 181.7 | na    | 168.5 |
